# Supplementary material for: Lead-Free MDABCO-NH4I3 Perovskite Crystals Embedded in Electrospun Nanofibers
Source: Materials (Basel). 2022 Nov 25;15(23):8397. doi: 10.3390/ma15238397 (PMC9739599; doi:10.3390/ma15238397)
Supplement: Supplementary file 1 [file materials-15-08397-s001.zip › materials-1999692-supplementary.pdf]

# Lead-free MDABCO-NH<sub>4</sub>I<sub>3</sub> perovskite crystals embedded in electrospun nanofibers

Rosa Baptista <sup>1,\*</sup>, Gonalo Moreira <sup>1</sup>, Bruna Silva <sup>1</sup>, Joo Oliveira <sup>1</sup>, Bernardo Almeida <sup>1</sup>, Cidlia Castro <sup>2</sup>, Pedro V. Rodrigues <sup>2</sup>, Ana Machado <sup>2</sup>, Michael Belsley <sup>2</sup> and Etelvina de Matos Gomes <sup>2</sup>

<sup>a</sup> Centre of Physics of Minho and Porto Universities (CF-UM-UP), University of Minho, Campus de Gualtar, 4710-057 Braga, Portugal

<sup>b</sup> Institute for Polymers and Composites, University of Minho, Campus de Azurm, 4800-058 Guimares

\*Corresponding author: rosa\_baptista@fisica.uminho.pt

## Supplementary Information

### SI1. XRD crystallites size

Estimates of the nanocrystal size,  $d$ , was obtained using the Scherrer equation

$$\beta_{hkl} = \frac{K\lambda}{d\cos\theta} \quad (1)$$

Here  $K$  is a correction factor to particle shape and  $\lambda$  the X-ray wavelength. In the absence of detailed shape information, a value of  $K = 0.90$  is commonly used <sup>[1]</sup>. The full width of the diffraction peak at half the maximum (FWHM) gives the broadening of a  $(hkl)$  reflection and is expressed as  $\beta_{hkl}$ . To estimate the FWHM, first the main peaks were eliminated from the spectra and a cubic spline was globally fit to the resulting background using the MATLAB application “shape language modeling” <sup>[2]</sup>.

Subsequently each individual background corrected peak was fit to and asymmetric Pseudo-Voigt profile using the MATLAB nonlinear least squares fitting algorithm. The Pseudo-Voigt function is,

$$I = A[\eta L(x) + (1 - \eta)G(x)] \quad (2)$$

Representing a weighted linear superposition of Lorentz  $L(x)$  and Gauss  $G(x)$  functions. Here the parameter  $\eta$  represents the fractional contribution of the Lorentz function while the parameter  $A$  is proportional to the amplitude of the

diffraction peak above the background. The Lorentzian and Gaussian functions are:

$$L(x) = \frac{(2/\pi\beta^*)}{1+4x^2} \quad (2a)$$

$$G(x) = \frac{2}{\beta^*} \sqrt{\frac{\ln(2)}{\pi}} \exp(-4\ln(2)x^2)$$

written in terms of the scaled diffraction angle

$$x = \frac{2(2\theta - 2\theta_c)}{\beta^*} \quad (2b)$$

and the asymmetric width function<sup>[3]</sup>

$$\beta^* = \frac{2\beta}{1 + \exp[a(2\theta - 2\theta_c)]} \quad (2c)$$

In these expressions, the calculated peak position is  $2\theta_c$  and  $a$  represents the asymmetry parameter.

The resulting fits are shown in Figure S1 a) to) while Tables S1 and S2 list the fit parameter values ( $A, \eta, \theta_c, \beta, a$ ) for the two peaks ( $11\bar{1}$ ) and (200). The red shading in Figure S1 represents the 68% confidence intervals of the fit peaks.

**Table S1:** Fit parameter values for the MDABCO-NH<sub>4</sub>I<sub>3</sub> embedded into PVC, PA66 and PMMA correspondent to Bragg reflection ( $11\bar{1}$ ).

|                                              | $A$    | $\eta$ | $2\theta_c$ | $\beta$ | $a$   |
|----------------------------------------------|--------|--------|-------------|---------|-------|
| MDABCO-NH <sub>4</sub> I <sub>3</sub> @ PVC  | 9.02   | 1.00   | 21.947°     | 0.124°  | -6.35 |
| MDABCO-NH <sub>4</sub> I <sub>3</sub> @ PA66 | 12.639 | 1.00   | 21.941°     | 0.099°  | -2.45 |
| MDABCO-NH <sub>4</sub> I <sub>3</sub> @ PMMA | 19.50  | 1.00   | 21.883      | 0.100°  | 4.846 |

**Table S2:** Fit parameter values for the MDABCO-NH<sub>4</sub>I<sub>3</sub> embedded into PVC, PA66 and PMMA correspondent to Bragg reflection (200).

|                                              | $A$   | $\eta$ | $2\theta_c$ | $\beta$ | $a$   |
|----------------------------------------------|-------|--------|-------------|---------|-------|
| MDABCO-NH <sub>4</sub> I <sub>3</sub> @ PVC  | 12.84 | 0.60   | 24.676°     | 0.158°  | 16.51 |
| MDABCO-NH <sub>4</sub> I <sub>3</sub> @ PA66 | 9.07  | 1.00   | 24.702°     | 0.103°  | 6.37  |
| MDABCO-NH <sub>4</sub> I <sub>3</sub> @ PMMA | 14.10 | 0.65   | 24.649°     | 0.121°  | 3.53  |

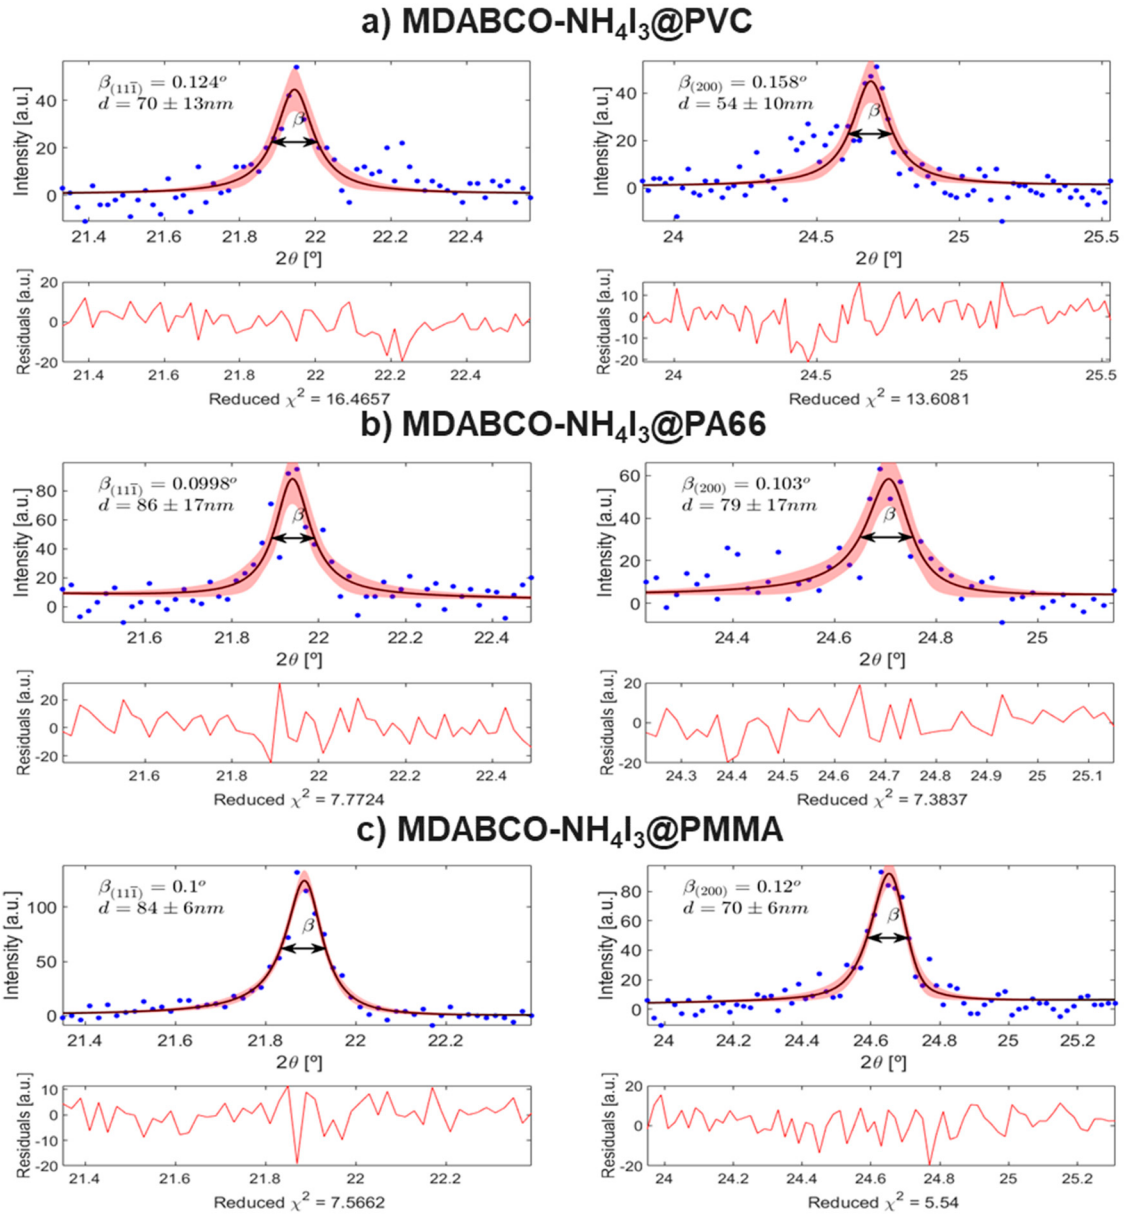

**Figure S1.** Asymmetric Pseudo-Voigt fits of the (111) and (200) Bragg reflections for MDABCO-NH<sub>4</sub>I<sub>3</sub> crystals inside a) PVC, b) PA66 and c) PMMA nanofibers. The width of the reflections at half the maximum  $\beta$  and the nanocrystals average size  $d$  is indicated as well the refit residuals.

## S2. UV-Visible Reflectance Spectra

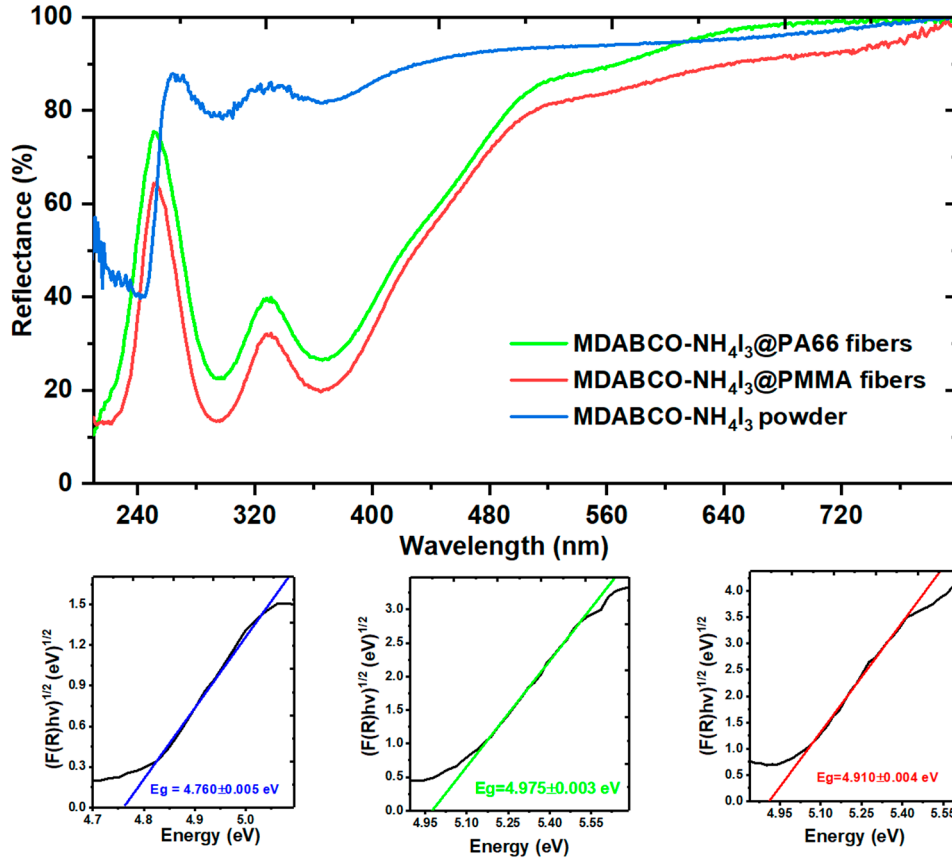

**Figure S2.** UV-vis reflectance of MDABCO-NH<sub>4</sub>I<sub>3</sub> powder pellet and electrospun fibers. The inset shows the Kubelka-Munk function indicating a band gap energy of 4.760 eV for the polycrystalline perovskite, 4.975 eV and 4.910 eV for MDABCO-NH<sub>4</sub>I<sub>3</sub>@PA66 and MDABCO-NH<sub>4</sub>I<sub>3</sub>@PMMA nanofibers, respectively.

## S3. DSC analysis

In figure S3, the measured DSC of synthesized MDABCO-NH<sub>4</sub>I<sub>3</sub> perovskite crystals, showed the ferroelectric-paraelectric phase transition to occur at 443 K with area 19.9 J/g. MDABCO-NH<sub>4</sub>I<sub>3</sub> perovskite crystals start to decompose above 460 K with the formation of NH<sub>4</sub>IO<sub>3</sub>. Cooling down from 473 K, shows a peak at 350 K, area -13.26 J/g. During the second heating, a peak with maximum at 358 K and area 12.3 J/g is observed. These two peaks correspond respectively to the paraelectric to ferroelectric and ferroelectric-paraelectric phase transitions of

$\text{NH}_4\text{IO}_3$  compound, which was formed after the first heating <sup>[4]</sup>. The perovskite phase transition at 443 K is not recovered, which reveals that crystal thermal degradation starts above 460 K<sup>[5]</sup>.

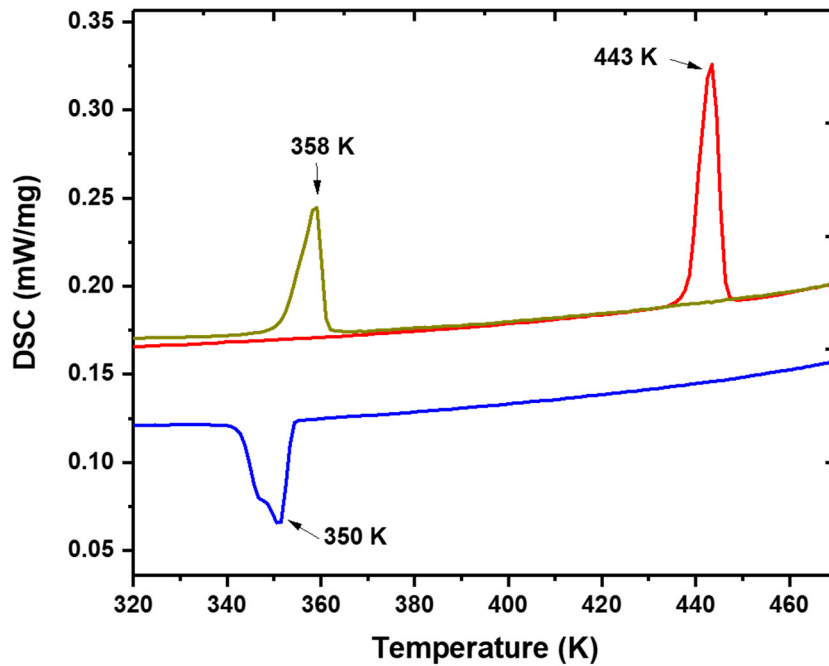

**Figure S3.** DSC spectra of synthesized MDABCO-NH<sub>4</sub>I<sub>3</sub> perovskite crystals.

#### S4. RAMAN Spectra

In Figure S4, the measured Raman modes between 50 – 600  $\text{cm}^{-1}$  are shown for a MDABCO-NH<sub>4</sub>I<sub>3</sub> polycrystalline sample, for electrospun fibers of PVC and MDABCO-NH<sub>4</sub>I<sub>3</sub>@PVC. In the spectra, the low frequency modes are due to lattice vibrations. From the two bands at 68  $\text{cm}^{-1}$  and 103  $\text{cm}^{-1}$  present in the polycrystalline sample, only the second band (now shifted to 109  $\text{cm}^{-1}$ ) remains intense for the perovskite nanocrystals embedded in the polymer fibers. The strong decreasing in intensity of the 68  $\text{cm}^{-1}$  band is probably the result of constraints imposed by the polymer matrix on the lattice vibrations modes, due to crystal confinement.

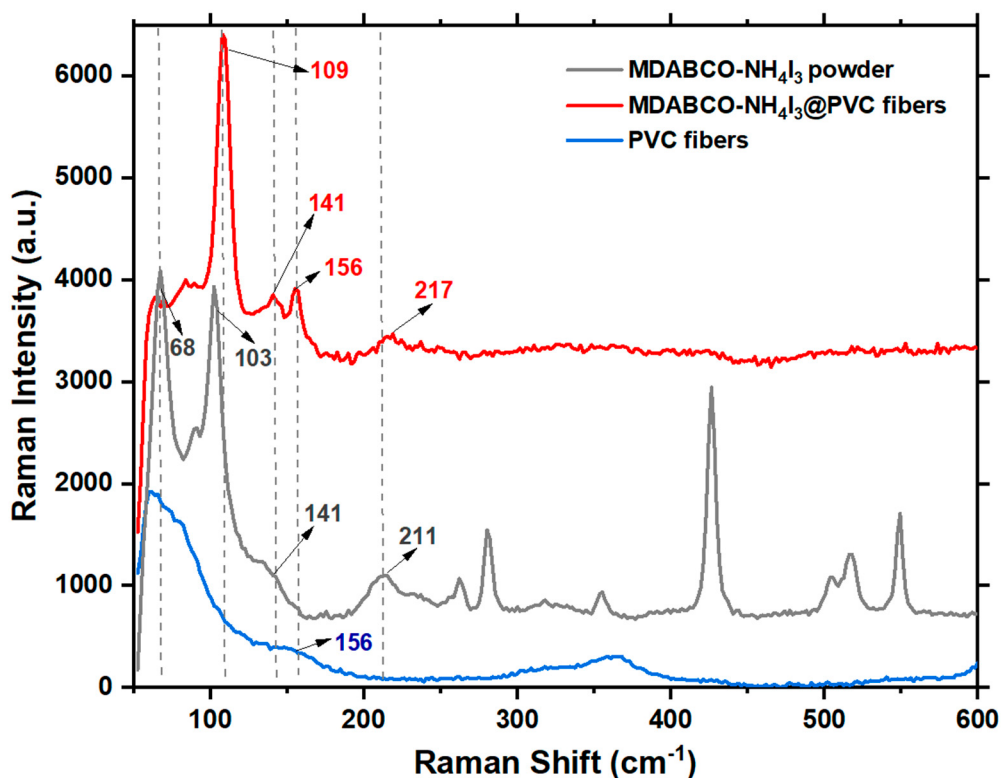

**Figure S4.** Raman spectra for MDABCO-NH<sub>4</sub>I<sub>3</sub> polycrystalline sample (black line), for electrospun fibers of PVC (blue line) and MDABCO-NH<sub>4</sub>I<sub>3</sub>@PVC fibers (red line), expansion between 50 – 600  $\text{cm}^{-1}$ .

The weak broad bands centred at 141  $\text{cm}^{-1}$  for polycrystalline MDABCO-NH<sub>4</sub>I<sub>3</sub> and 156  $\text{cm}^{-1}$  for PVC fibers, are resolved into well-defined bands for MDABCO-NH<sub>4</sub>I<sub>3</sub>@PVC fibers. The weak band for MDABCO-NH<sub>4</sub>I<sub>3</sub> at 211  $\text{cm}^{-1}$  is slightly shifted to 217  $\text{cm}^{-1}$ , for the perovskite incorporated into the fibers.

Noticed that for MDABCO-NH<sub>4</sub>I<sub>3</sub>@PVC fibers, none of the Raman peaks between 250 – 600  $\text{cm}^{-1}$  are perceptible, while they are present in the MDABCO-NH<sub>4</sub>I<sub>3</sub> perovskite spectra. We may conclude that the polymer matrix strongly constrains these perovskite vibrational modes as mentioned above, which is expectable as the fibers were electrospun from a precursor solution with ration of MDABCO-NH<sub>4</sub>I<sub>3</sub> to PVC of 1:5.

## S5. FTIR-ATR analysis

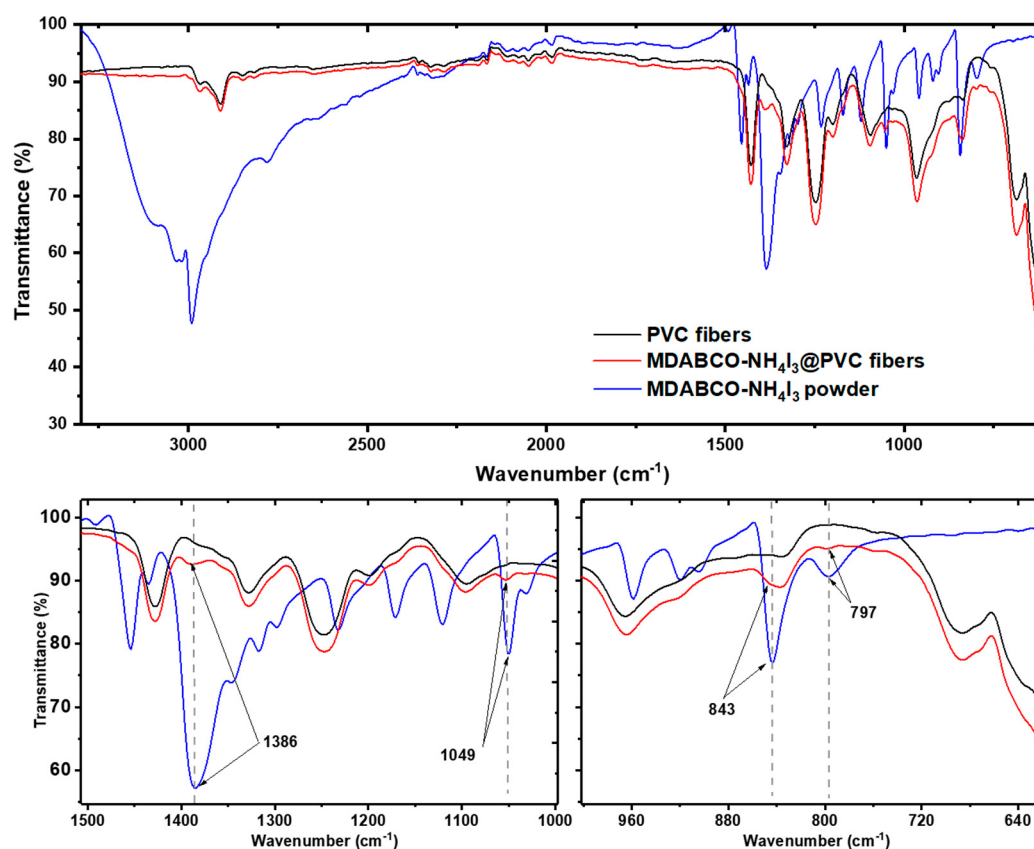

**Figure S5.** FTIR-ATR spectra of PVC polymer, MDABCO-NH<sub>4</sub>I<sub>3</sub> powder and MDABCO-NH<sub>4</sub>I<sub>3</sub>@PVC fibers, a) full measurement and b) expansion between 1000 – 1500  $\text{cm}^{-1}$  and 600 – 1000  $\text{cm}^{-1}$ .

In Figure S5 b), the measured FTIR-ATR between 1500 – 600  $\text{cm}^{-1}$  is shown for a MDABCO-NH<sub>4</sub>I<sub>3</sub> polycrystalline sample, for electrospun fibers of PVC and MDABCO-NH<sub>4</sub>I<sub>3</sub>@PVC. Slight differences were observed between the spectra of electrospun fibers of PVC and MDABCO-NH<sub>4</sub>I<sub>3</sub>@PVC, and just few bands (the most intense) were possible to be assigned to MDABCO-NH<sub>4</sub>I<sub>3</sub> perovskite nanocrystals at the 1386  $\text{cm}^{-1}$ , 1049  $\text{cm}^{-1}$ , 843  $\text{cm}^{-1}$  and 797  $\text{cm}^{-1}$ . However, the strong decreasing in intensity observed for the perovskite bands on electrospun fibers of MDABCO-NH<sub>4</sub>I<sub>3</sub>@PVC sample is due to the sobreposition of the polymer bands to those of MDABCO-NH<sub>4</sub>I<sub>3</sub> crystals. As already mentioned, the ratio perovskite and polymer are 1:5, on the precursor solution used to fabricate

the electrospun fibers. Therefore, is expected that the only the stronger perovskite bands will be observed. That contained a concentration constrain imposed by the polymer matrix on the IR bands.

## S6. Piezoelectric nanogenerator

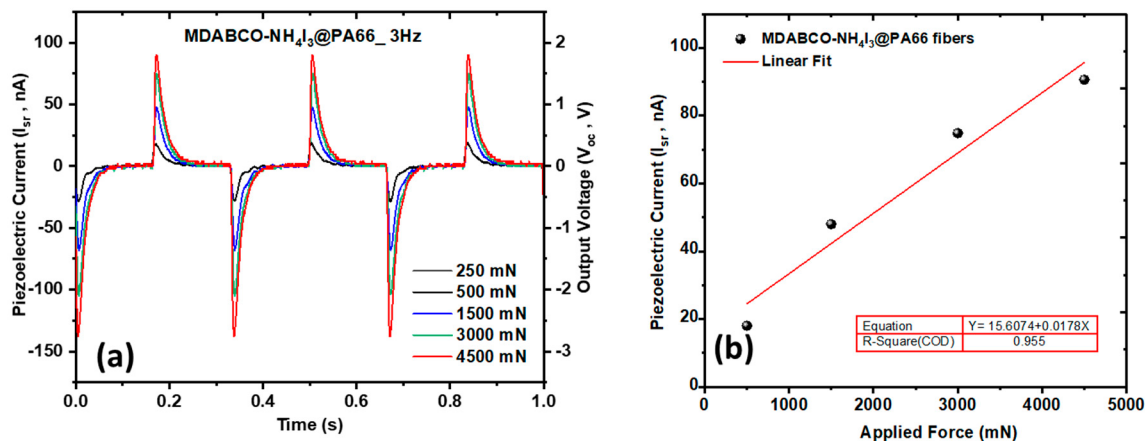

**Figure S6.** MDABCO-NH<sub>4</sub>I<sub>3</sub>@PA66 fibers (a) Piezoelectric current as function of time, for several applied forces and (b) linear fitting.

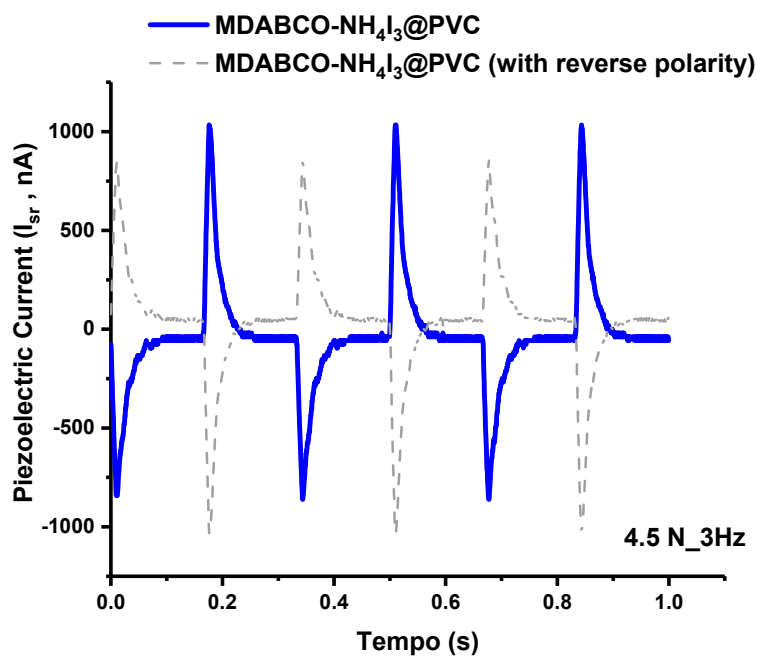

**Figure S7.** Output voltage generated from MDABCO-NH<sub>4</sub>I<sub>3</sub>@PVC nanofiber mat with reverse polarity.

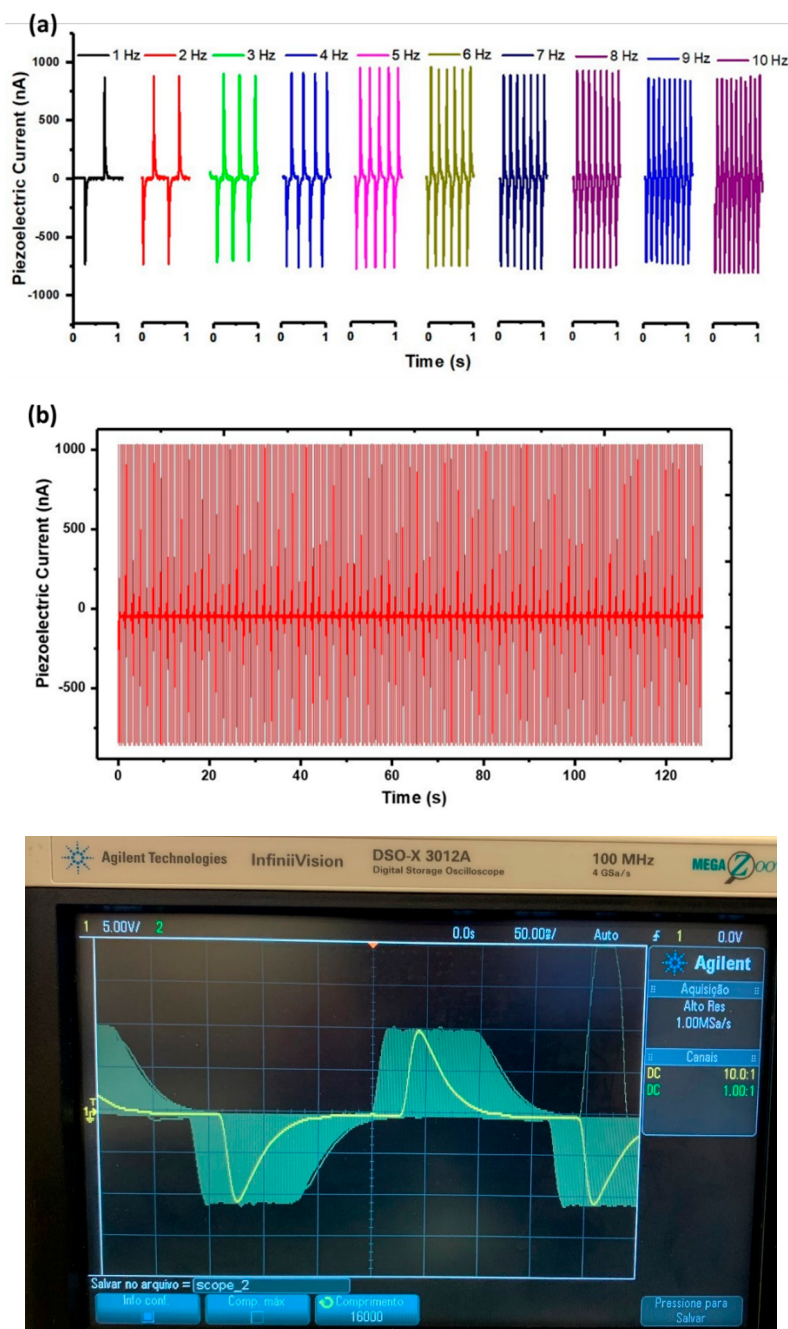

**Figure S8.** MDABCO-NH<sub>4</sub>I<sub>3</sub>@PVC nanofiber mat piezoelectric current generated a) for frequencies between 1 Hz and 10 Hz and b) a 130 s interval under a periodical force applied with 4.5 N. A stability test was performed during a time interval of 4 h under a periodical force applied with 2.7 N at a frequency of 3 Hz (oscilloscope image).

## S9. Mechanical Properties

Tensile strain applied to PVC and MDABCO-NH<sub>4</sub>I<sub>3</sub>@PVC electrospun fiber mat are shown in Figure S9. The results from tensile measurements show that MDABCO-NH<sub>4</sub>I<sub>3</sub>@PVC fibers exhibit good mechanical performance with an average increase of 14% on tensile strength (reaching ~ 4.0 MPa) and an increase of 40% on the strength at yield reaching (~ 2.5 MPa) when compared with PVC fibers. More importantly, the Young modulus increases from ~20 MPa in PVC fibers to ~58 MPa in MDABCO-NH<sub>4</sub>I<sub>3</sub>@PVC fibers, an increase of around 66%. This significant increase of the Young modulus of perovskite doped electrospun fibers indicates that composite MDABCO-NH<sub>4</sub>I<sub>3</sub>@PVC are mechanically stronger than neat polymer fibers. This is very important for the performance of MDABCO-NH<sub>4</sub>I<sub>3</sub>@PVC fiber mat as nanogenerator as it will increase its capability of supporting longer times under applied external force.

The decrease of 30% on the strain at break for doped fibers indicates a decrease in their plasticity, which might result from the presence of nanocrystals inside the PVC polymer which inhibits the capability for the PVC chains to flow between.<sup>[6]</sup>

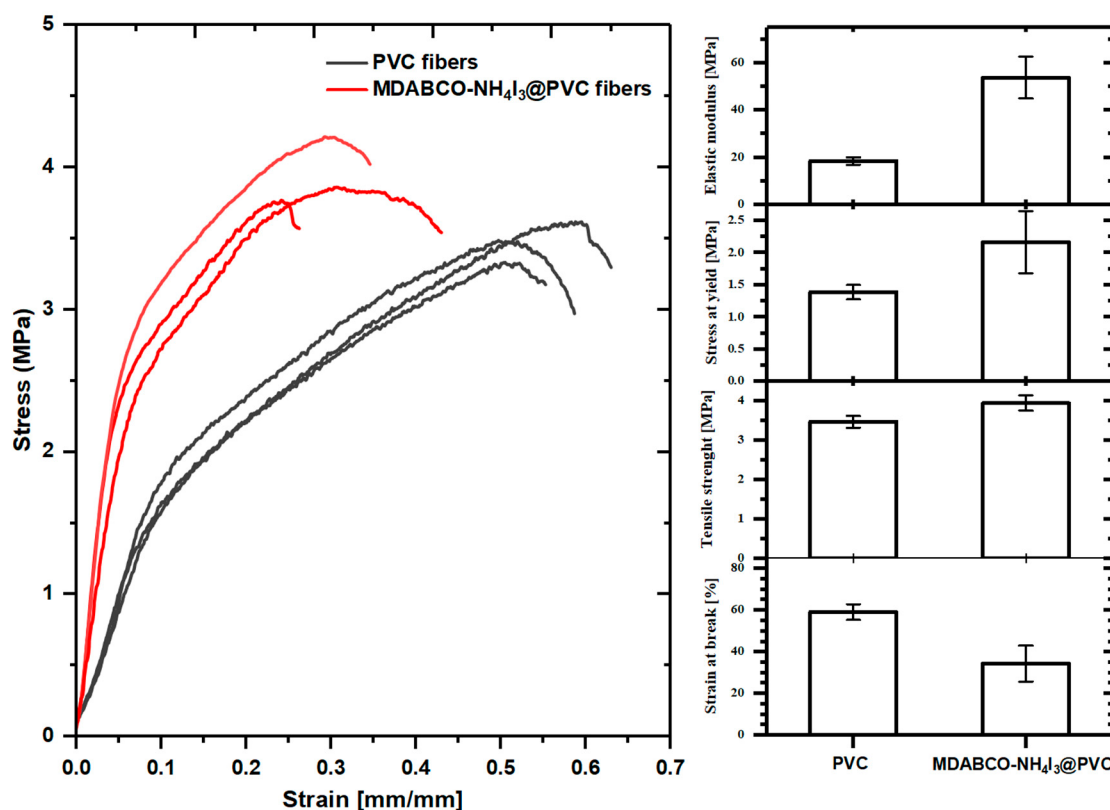

**Figure S9.** Elastic modulus, stress at yield, tensile strength and strain at break of PVC and MDABCO-NH<sub>4</sub>I<sub>3</sub>@PVC electrospun fibers.

## References

- (1) Klug, H.; Alexander, L., *X-Ray Diffraction Procedures 2nd edn*, Ch. 9. Wiley: 1974.
- (2) John D'Errico (2022). SLM - Shape Language Modeling.  
<https://www.mathworks.com/matlabcentral/fileexchange/24443-slm-shape-language-modeling>), MATLAB Central File Exchange. Retrieved July 5, 2022.
- (3) Stancik, A. L.; Brauns, E. B. A simple asymmetric lineshape for fitting infrared absorption spectra. *Vib Spectrosc* **2008**, 47 (1), 66-69, DOI: <https://doi.org/10.1016/j.vibspec.2008.02.009>.
- (4) Keve, E. T.; Abrahams, S. C.; Bernstein, J. L. Pyroelectric Ammonium Iodate, a Potential Ferroelastic: Crystal Structure. *The Journal of Chemical Physics* **1971**, 54 (6), 2556-2563, <https://doi.org/10.1063/1.1675212>.

- (5) Sirbu, D.; Tsui, H. C. L.; Alsaif, N.; Iglesias-Porras, S.; Zhang, Y.; Wang, M.; Liu, M.; Peacock, A. C.; Docampo, P.; Healy, N. Wide-Band-Gap Metal-Free Perovskite for Third-Order Nonlinear Optics. *Acs Photonics* **2021**, 8 (8), 2450-2458, <https://doi.org/10.1021/acsp Photonics.1c00687>.
- (6) Lee, D. W.; De Los Santos V, L.; Seo, J. W.; Felix, L. L.; Bustamante D, A.; Cole, J. M.; Barnes, C. H. W. The Structure of Graphite Oxide: Investigation of Its Surface Chemical Groups. *The Journal of Physical Chemistry B* **2010**, 114 (17), 5723-5728, <https://doi.org/10.1021/jp1002275>.
